# Supplementary material for: FBXO43 increases CCND1 stability to promote hepatocellular carcinoma cell proliferation and migration
Source: Frontiers journal article supplement (doi:10.3389/fonc.2023.1138348), 2023-03-03
Supplement: Image_1.PDF [file Image_1.PDF]

## *Supplementary Material*

### **FBXO43 increases CCND1 stability to promote hepatocellular carcinoma cell proliferation and migration**

**Chun-Ming Li<sup>1</sup>, Jie Zhang<sup>2</sup>, Wu Wu<sup>1</sup>, Zhu Zhu<sup>1</sup>, Feng Li<sup>3</sup>, Di Wu<sup>2</sup>, Xiao-Jun Wang<sup>2\*</sup>, Chuan-Ming Xie<sup>2\*</sup>, Jian-Ping Gong<sup>1\*</sup>**

<sup>1</sup>Department of Hepatobiliary Surgery, The Second Affiliated Hospital of Chongqing Medical University, Chongqing 400010, China

<sup>2</sup>Key Laboratory of Hepatobiliary and Pancreatic Surgery, Institute of Hepatobiliary Surgery, Southwest Hospital, Third Military Medical University (Army Medical University), Chongqing 400038, China

<sup>3</sup>Department of Hepatobiliary Surgery, The Third Affiliated Hospital of Chongqing Medical University, Chongqing 401120, China

**\* Correspondence:**

Jian-Ping Gong, E-mail: gongjianping11@126.com

Chuan-Ming Xie, E-mail: cmxie@tmmu.edu.cn; chuanming506@126.com; Tel: +86 23 68765809, Fax: +86 23 68765809.

Xiao-Jun Wang, E-mail: yh830@163.com.

## **1 Supplementary Figures and Tables**

### **1.1 Supplementary Fig. 1**

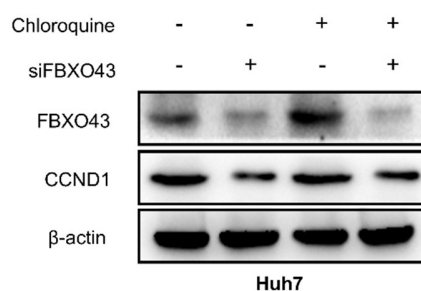

### **Supplementary Fig. 1. FBXO43 regulates CCND1 without the involvement of lysosomes**

The Western blots to detect the level of CCND1 in siCtrl- or siFBXO43-treated Huh7 cells with or without a lysosome inhibitor (50  $\mu$ M chloroquine).
